# Supplementary material
Source: publisher site journal article supplement (https://www.dovepress.com/article/476612)
Supplement: Supplementary file 1 [file get_supplementary_file.php]

**Supplementary Tables:**

Table S1.The clinical sample information of hepatocellular carcinoma patients

| Characteristic | | Number (Total Number=25) |
| --- | --- | --- |
| Age group  (median years) | < 53 years | 12 |
| ≥ 53 years | 13 |
| Sex | Male | 21 |
| Female | 4 |
| Pathological grade (Edmondson-Steiner) | I | 0 |
| II | 20 |
| III | 4 |
| IV | 1 |
| MVI | M0 | 15 |
| M1 | 6 |
| M2 | 4 |
| Primary organization | Yes | 25 |
| No | 0 |

**Notes:**

**Abbreviations:** MVI, Microvascular invasion.

Table S2. The synthesis report sheet of sequences

| Target gene | sense（5'-3'） | antisense（5'-3'） |
| --- | --- | --- |
| siNDST2-1 | CCGCUAUGUCUUGGUCAUUUATT | UAAAUGACCAAGACAUAGCGGTT |
| siNDST2-2 | CCGGAACCAUAAUUUGGAGUUTT | AACUCCAAAUUAUGGUUCCGGTT |
| siNDST2-3 | GCUGCUUAAUCCGAUCAGCAUTT | AUGCUGAUCGGAUUAAGCAGCTT |
| siFOXP4-1 | CCAGUUUAUCAAACACCUCAATT | UUGAGGUGUUUGAUAAACUGGTT |
| siFOXP4-2 | CACCAGGAUGUUCGCCUAUUUTT | AAAUAGGCGAACAUCCUGGUGTT |
| siFOXP4-3 | CCAGGGAACAAUGACAGCAAATT | UUUGCUGUCAUUGUUCCCUGGTT |
| NC | UUCUCCGAACGUGUCACGUTT | ACGUGACACGUUCGGAGAATT |

**Notes:**

**Abbreviations:** siNDST2-1, Small interfering RNA sequence 1 for NDST2; siNDST2-2, Small interfering RNA sequence 2 for NDST2; siNDST2-3, Small interfering RNA sequence 3 for NDST2; siFOXP4-1, Small interfering RNA sequence 1 for FOXP4; siFOXP4-2, Small interfering RNA sequence 2 for FOXP4; siFOXP4-3, Small interfering RNA sequence 3 for FOXP4; NC, Negative control.

Table S3. Primer sequences of PCR

| Target gene | Forward Primer Sequence（5'-3'） | Reverse Primer Sequence（5'-3'） |
| --- | --- | --- |
| NDST2 | TGGTCCAAGGAGAAAACCTG | GTGCAGGCTCAGGAAGAAGT |
| FOXP4 | GTGAGATGAGTCCCGCAGAG | AGGCAGACTGTTTGCTGTCA |
| GAPDH | CAGGAGGCATTGCTGATGAT | GAAGGCTGGGGCTCATTT |
| β-actin | TGGCACCCAGCACAATGAA | CTAAGTCATAGTCCGCCTAGAAGCA |

**Notes:**

**Abbreviations:** NDST2, N-deacetylase and N-sulfotransferase 2; FOXP4, Forkhead box P4; GAPDH, Glyceraldehyde-3-phosphate dehydrogenase.

Table S4. Sample information of the tissue microarray

| Characteristic | | Number (Total Number=80) |
| --- | --- | --- |
| Age group  (median years) | < 58 years | 40 |
| ≥ 58 years | 39 |
| Unspecified | 1 |
| Sex | Male | 64 |
| Female | 16 |
| Tumor size / cm | < 5 | 16 |
| ≥ 5 | 64 |
| Tumor count | Single | 68 |
| Multiple | 12 |
| Pathological grade (Edmondson-Steiner) | ≤ Ⅱ | 40 |
| II-III | 39 |
| > Ⅲ | 1 |
| TNM staging | < 2 | 4 |
| ≥ 2 | 62 |
| Unspecified | 14 |

**Notes:**

**Abbreviations:** TNM, Tumor Node Metastasis.
